# Supplementary material
Source: PubMed Central journal article supplement (PMC9846953)
Supplement: NIHMS1858463-supplement-supinfo.pdf [file NIHMS1858463-supplement-supinfo.pdf]

# CARDIAC FIBROSIS IN THREE DIMENSIONS- MECHANISTIC INSIGHTS INTO ARRHYTHMIC RISK DUE TO HYPERTROPHY

Kalyanam Shivkumar, Zhilin Qu, and Robert D Harvey

DOI: 10.1113/JP283710

*Corresponding author(s): Kalyanam Shivkumar (KShivkumar@mednet.ucla.edu)*

*The following individual(s) involved in review of this submission have agreed to reveal their identity: Mark L Trew (Referee #1)*

---

## Review Timeline:

|                     |             |
|---------------------|-------------|
| Submission Date:    | 21-Sep-2022 |
| Editorial Decision: | 25-Sep-2022 |
| Revision Received:  | 07-Dec-2022 |
| Accepted:           | 12-Dec-2022 |

---

*Senior Editor: Harold Schultz*

*Reviewing Editor: Bjorn Knollmann*

## Transaction Report:

(Note: With the exception of the correction of typographical or spelling errors that could be a source of ambiguity, letters and reports are not edited. Depending on transfer agreements, referee reports obtained elsewhere may or may not be included in this compilation. Referee reports are anonymous unless the Referee chooses to sign their reports.)

Dear Dr Shivkumar,

Re: JP-TP-2022-283710 "CARDIAC FIBROSIS IN THREE DIMENSIONS-MECHANISTIC INSIGHTS INTO ARRHYTHMIC RISK DUE TO HYPERTROPHY" by Kalyanam Shivkumar, Zhilin Qu, and Robert D Harvey

Thank you for submitting your invited Translational Perspectives to The Journal of Physiology. It has been assessed by a Reviewing Editor and an author of the focus paper. Some minor revisions have been requested.

The reports are copied at the end of this email.

**NEW POLICY:** In order to improve the transparency of its peer review process The Journal of Physiology publishes online as supporting information the peer review history of all articles accepted for publication. Readers will have access to decision letters, including all Editors' comments and referee reports, for each version of the manuscript and any author responses to peer review comments. Referees can decide whether or not they wish to be named on the peer review history document.

Your revised manuscript should be submitted online using the links in Author Tasks Link Not Available.

Please submit the revised version of the article in Word format and ensure the focus paper is referenced.

I look forward to receiving your revised submission and thank you very much for your contribution to The Journal.

Yours sincerely,

Harold D Schultz  
Senior Editor  
The Journal of Physiology  
<https://jp.msubmit.net>  
<http://jp.physoc.org>  
The Physiological Society  
Hodgkin Huxley House  
30 Farringdon Lane  
London, EC1R 3AW  
UK  
<http://www.physoc.org>  
<http://journals.physoc.org>

-----  
EDITOR COMMENTS

Reviewing Editor:

I enjoyed reading the translational perspective, which is balanced and well-referenced. I have two suggestions for the authors:

1. Panels A and B from the figure are reproductions from the article. It is not clear how they relate to panel C, which is a classic arrhythmia mechanism diagram. Since panels A and B are not referred to in the text of the perspective, I suggest simply deleting the panel and only show the diagram of panel C as a figure.
2. There are several very long and complicated sentences in the piece. For example "The resultant changes such as conduction block, fibrosis induced source-sink mismatch and enhanced formation of triggers in turn by fibrosis can collude to provide both the trigger and the substrate for lethal arrhythmias (Figure)." Please edit for clarity, fix spelling mistakes, and adhere to J Physiol style of referencing.

Senior Editor:

The reviewers are very excited about your article, and it is thought to be highly influential. The reviewing editor does raise a couple of concerns and minor suggestions. We can not reprint figures from the published paper without author permission and proper attribution. It would be best to simply refer to the figures and submit Panel C as your figure. Also please correct the citation and reference style to that used for our Journal (format found in Instructions to Authors). It is also suggested to proof and revise for clarity and spellings. Thank you for your efforts on a great perspective.

-----

## REFEREE COMMENTS

Referee #1:

This is a very nice, highly informed and factually correct summary of factors driving VT/VF.

The authors of Khwaounjoo et al agree with the commentary in the perspective around the role of cardiac innervation and subsequent function control leading to cardiac VT/VF in the SHR model. There is exciting potential for further research around the plasticity and arrhythmic role of ganglionated plexi on the epicardium, and whether this precedes and/or coincides with fibrosis. The SHR is also a good model for such studies.

---

END OF COMMENTS

**Confidential Review**

**21-Sep-2022**

---



**RESPONSE TO REVIEWS:**

EDITOR COMMENTS

Reviewing Editor:

I enjoyed reading the translational perspective, which is balanced and well-referenced. I have two suggestions for the authors:

1. Panels A and B from the figure are reproductions from the article. It is not clear how they relate to panel C, which is a classic arrhythmia mechanism diagram. Since panels A and B are not referred to in the text of the perspective, I suggest simply deleting the panel and only show the diagram of panel C as a figure.

Thank you, we have done this.

2. There are several very long and complicated sentences in the piece. For example "The resultant changes such as conduction block, fibrosis induced source-sink mismatch and enhanced formation of triggers in turn by fibrosis can collude to provide both the trigger and the substrate for lethal arrhythmias (Figure)." Please edit for clarity, fix spelling mistakes, and adhere to J Physiol style of referencing.

Thank you, we have made these corrections.

Senior Editor:

The reviewers are very excited about your article, and it is thought to be highly influential. The reviewing editor does raise a couple of concerns and minor suggestions. We can not reprint figures from the published paper without author permission and proper attribution. It would be best to simply refer to the figures and submit Panel C as your figure. Also please correct the citation and reference style to that used for our Journal (format found in Instructions to Authors). It is also suggested to proof and revise for clarity and spellings. Thank you for your efforts on a great perspective.

Thank you, we have made the changes.

-----

REFEREE COMMENTS

Referee #1:

This is a very nice, highly informed and factually correct summary of factors driving VT/VF.

The authors of Khwaounjoo et al agree with the commentary in the perspective around the role of cardiac innervation and subsequent function control leading to cardiac VT/VF in the SHR model. There is exciting potential for further research around the plasticity and arrhythmic role of ganglionated plexi on the epicardium, and whether this precedes and/or coincides with fibrosis. The SHR is also a good model for such studies.

Thank you.

Dear Dr Shivkumar,

Re: JP-TP-2022-283710R1 "CARDIAC FIBROSIS IN THREE DIMENSIONS-MECHANISTIC INSIGHTS INTO ARRHYTHMIC RISK DUE TO HYPERTROPHY" by Kalyanam Shivkumar, Zhilin Qu, and Robert D Harvey

We are pleased to tell you that your paper has been accepted for publication in The Journal of Physiology.

**TRANSPARENT PEER REVIEW POLICY:** To improve the transparency of its peer review process The Journal of Physiology publishes online, as supporting information, the peer review history of all articles accepted for publication. Readers will have access to decision letters, including Editors' comments and referee reports, for each version of the manuscript, as well as any author responses to peer review comments. Referees can decide whether or not they wish to be named on the peer review history document.

The last Word (or similar) version of the manuscript provided will be used by the Production Editor to prepare your proof. When this is ready you will receive an email containing a link to Wiley's Online Proofing System. The proof should be thoroughly checked and corrected as promptly as possible.

Authors should note that it is too late at this point to offer corrections prior to proofing. The accepted version will be published online, ahead of the copy edited and typeset version being made available. Major corrections at proof stage, such as changes to figures, will be referred to the Editors for approval before they can be incorporated. Only minor changes, such as to style and consistency, should be made at proof stage. Changes that need to be made after proof stage will usually require a formal correction notice.

All queries at proof stage should be sent to: TJP@wiley.com

Are you on Twitter? Once your paper is online, why not share your achievement with your followers? Please tag The Journal (@jphysiol) in any tweets and we will share your accepted paper with our 30,000 followers!

Yours sincerely,

Harold D Schultz  
Senior Editor  
The Journal of Physiology  
<https://jp.msubmit.net>  
<http://jp.physoc.org>  
The Physiological Society  
Hodgkin Huxley House  
30 Farringdon Lane  
London, EC1R 3AW  
UK  
<http://www.physoc.org>  
<http://journals.physoc.org>

P.S. - You can help your research get the attention it deserves! Check out Wiley's free Promotion Guide for best-practice recommendations for promoting your work at [www.wileyauthors.com/eoo/guide](http://www.wileyauthors.com/eoo/guide). You can learn more about Wiley Editing Services which offers professional video, design, and writing services to create shareable video abstracts, infographics, conference posters, lay summaries, and research news stories for your research at [www.wileyauthors.com/eoo/promotion](http://www.wileyauthors.com/eoo/promotion).

**IMPORTANT NOTICE ABOUT OPEN ACCESS:** To assist authors whose funding agencies mandate public access to published research findings sooner than 12 months after publication The Journal of Physiology allows authors to pay an Open Access (OA) fee to have their papers made freely available immediately on publication.

The Corresponding Author will receive an email from Wiley with details on how to register or log-in to Wiley Authors Services where you will be able to place an order.

You can check if your funder or institution has a Wiley Open Access Account here: <https://authorservices.wiley.com/author-resources/Journal-Authors/licensing-and-open-access/open-access/author-compliance-tool.html>

\*\*\*\*\*

COMMENTS FOR AUTHOR:

Reviewing Editor:

No further concerns. Very nice piece.

Senior Editor:

Thank you for providing this insightful article to the Journal of Physiology

\*\*\*\*\*

Reviewer 1:

The revisions have improved the manuscript. No further comments.

\*\*\*\*\*

**1st Confidential Review**

**07-Dec-2022**

---
